# Supplementary material for: In Vivo Classification and Characterization of Carotid Atherosclerotic Lesions with Integrated 18F-FDG PET/MRI
Source: MDPI journal article supplement (doi:10.3390/diagnostics14101006), 2024-05-13
Supplement: s1 [file s1]

Table S1. Integrated PET/MR acquisition parameters

| <b>MR sequence</b>  | <b>TR/TE (ms)</b> | <b>FOV (mm)</b> | <b>resolution (mm)</b> | <b>slice number</b> | <b>Scan time</b> |
|---------------------|-------------------|-----------------|------------------------|---------------------|------------------|
| <b>TOF-MRA</b>      | 17.5/ 4           | 180×180         | 0.75*0.60*1.5          | 323                 | 5:45             |
| <b>3D-T1 FSE</b>    | 800 / 14.52       | 180×180         | 0.60*0.60*0.60         | 390                 | 6:50             |
| <b>3D-T2 FSE</b>    | 2000 / 198.44     | 180×180         | 0.60*0.60*0.60         | 390                 | 6:36             |
| <b>3D-T1 FSE C+</b> | 800 / 14.52       | 180×180         | 0.60*0.60*0.60         | 390                 | 6:50             |

Table S2. Prevalence of high and low risk plaque identified by single component model and combined model

| Classification according to single component model<br>(MR AHA type IV-V) | Classification according to combined model (MR AHA type + stenosis degree + TBR) |          |       |
|--------------------------------------------------------------------------|----------------------------------------------------------------------------------|----------|-------|
|                                                                          | high risk                                                                        | low risk | total |
| High risk (Type IV-V)                                                    |                                                                                  |          |       |
| Symptomatic                                                              | 23                                                                               | 5        | 28    |
| Asymptomatic                                                             | 72                                                                               | 74       | 146   |
| NRI, %                                                                   |                                                                                  |          |       |
| Symptomatic                                                              | -17.9                                                                            |          |       |
| Asymptomatic                                                             | 50.7                                                                             |          |       |
| Overall                                                                  | 32.8                                                                             |          |       |
| Low risk (other types)                                                   |                                                                                  |          |       |
| Symptomatic                                                              | 56                                                                               | 5        | 61    |
| Asymptomatic                                                             | 128                                                                              | 149      | 277   |
| NRI, %                                                                   |                                                                                  |          |       |
| Symptomatic                                                              | 91.8                                                                             |          |       |
| Asymptomatic                                                             | -46.2                                                                            |          |       |
| Overall                                                                  | 45.6                                                                             |          |       |
| Total                                                                    |                                                                                  |          |       |
| Symptomatic                                                              | 79                                                                               | 10       | 89    |
| Asymptomatic                                                             | 200                                                                              | 223      | 423   |
| NRI, %                                                                   |                                                                                  |          |       |
| Symptomatic                                                              | 57.3                                                                             |          |       |
| Asymptomatic                                                             | -12.8                                                                            |          |       |
| Overall                                                                  | 44.5                                                                             |          |       |

| Classification according to single component model<br>(MR AHA type VI) | Classification according to combined model (MR AHA type + stenosis degree + TBR) |          |       |
|------------------------------------------------------------------------|----------------------------------------------------------------------------------|----------|-------|
|                                                                        | high risk                                                                        | low risk | total |
| High risk (Type VI)                                                    |                                                                                  |          |       |
| Symptomatic                                                            | 44                                                                               | 0        | 44    |
| Asymptomatic                                                           | 67                                                                               | 2        | 69    |
| NRI, %                                                                 |                                                                                  |          |       |
| Symptomatic                                                            | 0                                                                                |          |       |
| Asymptomatic                                                           | 2.9                                                                              |          |       |
| Overall                                                                | 2.9                                                                              |          |       |
| Low risk (other types)                                                 |                                                                                  |          |       |
| Symptomatic                                                            | 29                                                                               | 16       | 45    |
| Asymptomatic                                                           | 81                                                                               | 273      | 354   |
| NRI, %                                                                 |                                                                                  |          |       |
| Symptomatic                                                            | 64.4                                                                             |          |       |
| Asymptomatic                                                           | -22.9                                                                            |          |       |

|              |       |     |     |
|--------------|-------|-----|-----|
| Overall      | 41.6  |     |     |
| Total        |       |     |     |
| Symptomatic  | 73    | 16  | 89  |
| Asymptomatic | 148   | 275 | 423 |
| NRI, %       |       |     |     |
| Symptomatic  | 32.6  |     |     |
| Asymptomatic | -18.7 |     |     |
| Overall      | 13.9  |     |     |

| Classification according to single component model (MR AHA type VII) | Classification according to combined model (MR AHA type + stenosis degree + TBR) |          |       |
|----------------------------------------------------------------------|----------------------------------------------------------------------------------|----------|-------|
|                                                                      | high risk                                                                        | low risk | total |
| High risk (Type VII)                                                 |                                                                                  |          |       |
| Symptomatic                                                          | 3                                                                                | 5        | 8     |
| Asymptomatic                                                         | 15                                                                               | 62       | 77    |
| NRI, %                                                               |                                                                                  |          |       |
| Symptomatic                                                          | -62.5                                                                            |          |       |
| Asymptomatic                                                         | 80.5                                                                             |          |       |
| Overall                                                              | 18.0                                                                             |          |       |
| Low risk (other types)                                               |                                                                                  |          |       |
| Symptomatic                                                          | 72                                                                               | 9        | 81    |
| Asymptomatic                                                         | 166                                                                              | 180      | 346   |
| NRI, %                                                               |                                                                                  |          |       |
| Symptomatic                                                          | 88.9                                                                             |          |       |
| Asymptomatic                                                         | -48.0                                                                            |          |       |
| Overall                                                              | 40.9                                                                             |          |       |
| Total                                                                |                                                                                  |          |       |
| Symptomatic                                                          | 75                                                                               | 14       | 89    |
| Asymptomatic                                                         | 181                                                                              | 242      | 423   |
| NRI, %                                                               |                                                                                  |          |       |
| Symptomatic                                                          | 75.3                                                                             |          |       |
| Asymptomatic                                                         | -24.6                                                                            |          |       |
| Overall                                                              | 50.7                                                                             |          |       |

| Classification according to single component model (MR AHA type VIII) | Classification according to combined model (MR AHA type + stenosis degree + TBR) |          |       |
|-----------------------------------------------------------------------|----------------------------------------------------------------------------------|----------|-------|
|                                                                       | high risk                                                                        | low risk | total |
| High risk (Type VIII)                                                 |                                                                                  |          |       |
| Symptomatic                                                           | 7                                                                                | 0        | 7     |
| Asymptomatic                                                          | 22                                                                               | 1        | 23    |
| NRI, %                                                                |                                                                                  |          |       |
| Symptomatic                                                           | 0                                                                                |          |       |

|                        |       |     |     |
|------------------------|-------|-----|-----|
| Asymptomatic           | 4.3   |     |     |
| Overall                | 4.3   |     |     |
| Low risk (other types) |       |     |     |
| Symptomatic            | 73    | 9   | 82  |
| Asymptomatic           | 186   | 214 | 400 |
| NRI, %                 |       |     |     |
| Symptomatic            | 89.0  |     |     |
| Asymptomatic           | -46.5 |     |     |
| Overall                | 42.5  |     |     |
| Total                  |       |     |     |
| Symptomatic            | 80    | 9   | 89  |
| Asymptomatic           | 208   | 215 | 423 |
| NRI, %                 |       |     |     |
| Symptomatic            | 82.0  |     |     |
| Asymptomatic           | -43.7 |     |     |
| Overall                | 38.3  |     |     |
